# Supplementary material
Source: publisher figshare collection journal article supplement (https://tandf.figshare.com/ndownloader/files/22266021)
Supplement: Supplementary file 1 [file 22266021]

**Supplementary material**

**Supplementary figure 1: Effect of a platelet dose-response (range, 10-415*109/L) on thrombin generation in 3 healthy individuals.** Average TG curves measured with 1 pM TF were determined in PRP with a varying platelet count (A). ETP (B), lag time (C), peak height (D), time-to-peak (E) and velocity index (VelIndex; F) were quantified. The data are shown as mean ± SD.

**Supplementary figure 2: Effect of a platelet dose-response (range, 10-415*109/L) on thrombin dynamics in 3 healthy individuals.** Averaged prothrombin conversion curves in PRP with a varying platelet count (A). Total amount of prothrombin converted (PCtot; B), maximum rate of prothrombin conversion (PCmax; C) during TG were quantified from the prothrombin conversion data. The data are shown as mean ± SD.
